# Supplementary material for: Modeling Adverse Events Counts in the Bulgarian Pharmacovigilance Database
Source: Preprints.org preprint supplement (doi:10.20944/preprints202309.0849.v1), 2023-09-13
Supplement: Supplementary file 3 [file supplementary]

# Supplementary materials

## Tables

Table S1: Parameters calculated in the parametric models and their significance

|                       | Estimate | Std. Error | t value  | Pr(> t ) |     |
|-----------------------|----------|------------|----------|----------|-----|
| <b>COVID vaccines</b> |          |            |          |          |     |
| <i>ZANBI</i>          |          |            |          |          |     |
| eta.mu                | 1.28446  | 0.01355    | 94.8     | <2e-16   | *** |
| eta.sigma             | -1.2099  | 0.06096    | -19.85   | <2e-16   | *** |
| eta.nu                | -20.61   | 494.30     | -0.042   | 0.967    |     |
| <i>ZAPIG</i>          |          |            |          |          |     |
| eta.mu                | 1.30337  | 0.01264    | 103.1    | <2e-16   | *** |
| eta.sigma             | -1.2733  | 0.06106    | -20.85   | <2e-16   | *** |
| eta.nu                | -19.37   | 250.66     | -0.077   | 0.938    |     |
| <b>Other drugs</b>    |          |            |          |          |     |
| <i>ZANBI</i>          |          |            |          |          |     |
| eta.mu                | 0.14781  | 0.04808    | 3.07408  | 0.00211  | **  |
| eta.sigma             | 0.56955  | 0.08895    | 6.40267  | 1.52e-10 | *** |
| eta.nu                | -22.55   | 1482.91    | -0.01521 | 0.987    |     |
| <i>ZAPIG</i>          |          |            |          |          |     |
| eta.mu                | 0.46367  | 0.02105    | 22.02865 | <2e-16   | *** |
| eta.sigma             | 0.06889  | 0.05608    | 1.22856  | 0.21924  |     |
| eta.nu                | -22.56   | 1048.58    | -0.02151 | 0.983    |     |

## Figures

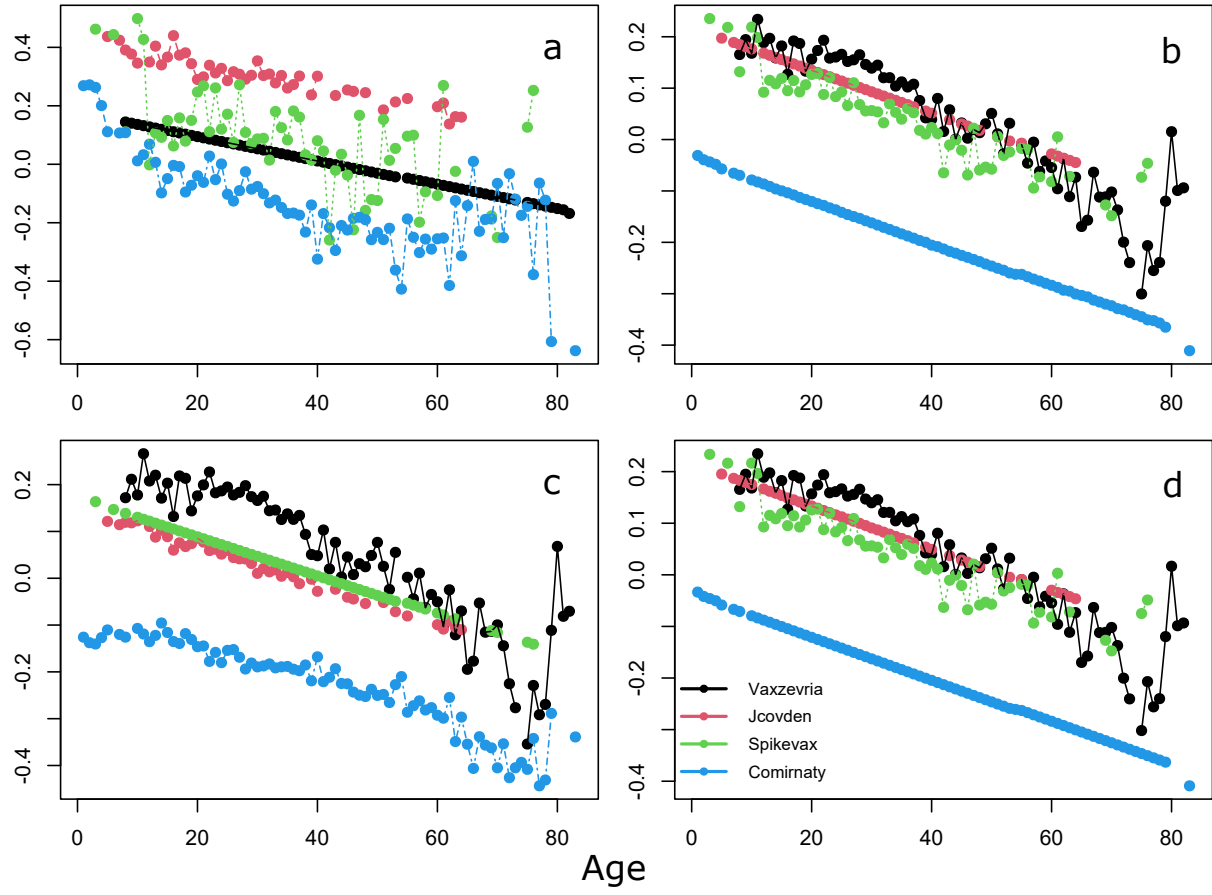

Figure S1: Age dependence of  $\log \hat{\mu}$  for the levels of factor Vaccine, for different reference vaccines. Reference vaccine: a, Vaxzevria; b, Jcovden; c, Spikevax; d, Comirnaty.

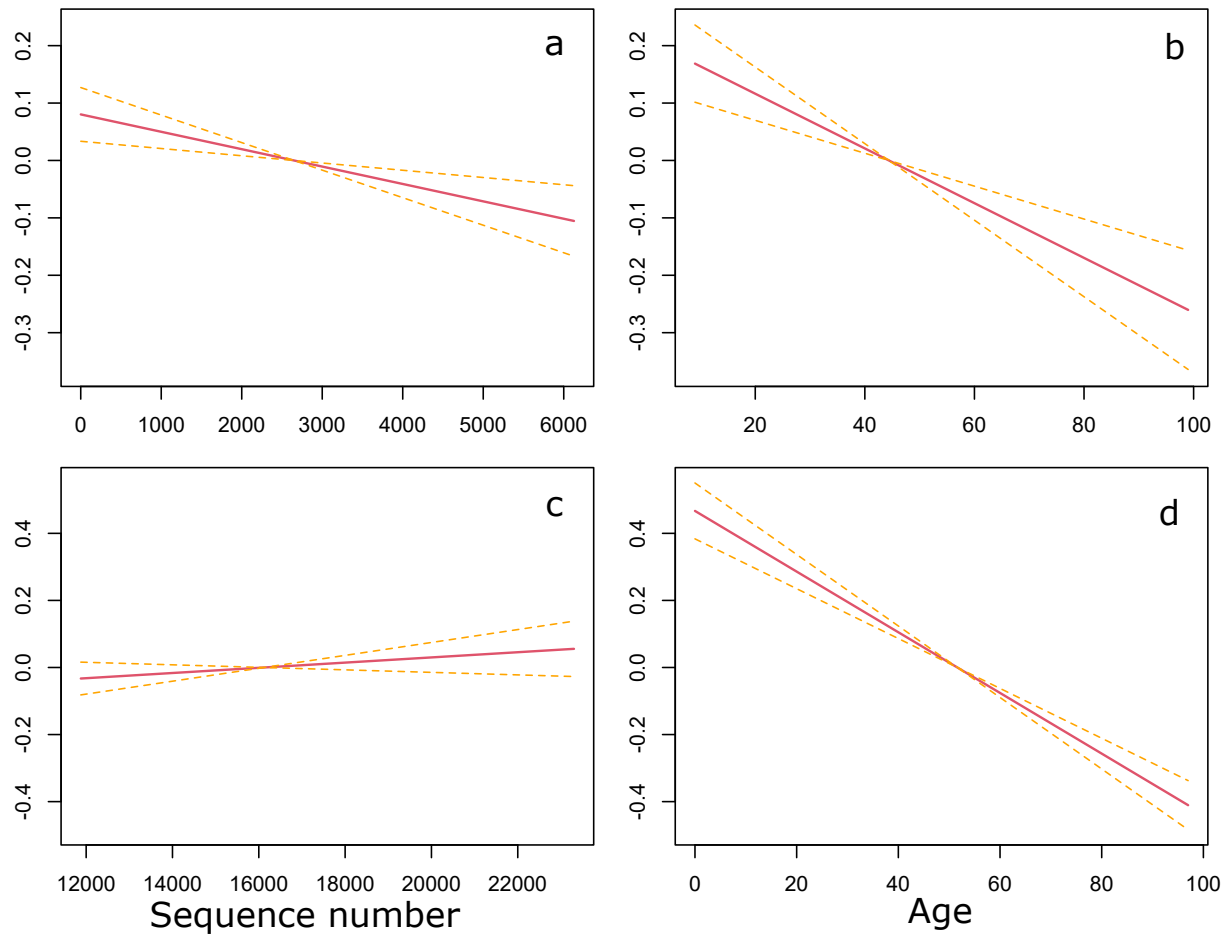

Figure S2: Term plots for Sequence-number and Age dependence of  $\log \hat{\mu}$  for COVID-19 vaccines Model 15.6 (a and b) and other drugs data Model 29.6 (c and d).

## *R code*

```
# Load data for COVID-19 vaccines and for Other drugs
library(readxl)
COVID <- read_excel("COVID_Vaccine_data.xlsx")
Other <- read_excel("Other_Drugs_data.xlsx")

# Bespoke function for calculating the Pearson dispersion statistic
overdisp_fun <- function(model) {
  rdf <- df.residual(model)
  rp <- resid(model, type="p")
  Pearson.chisq <- sum(na.omit(rp^2))
  prat <- Pearson.chisq/rdf
  pval <- pchisq(Pearson.chisq, df=rdf, lower.tail=FALSE)
  c(chisq=Pearson.chisq, ratio=prat, rdf=rdf, p=pval)
}
overdisp_fun(Model15.6)
```

```

# Calculating the overdispersion by the Cameron
# and Trivedi (1990, 2013) method
library(overdisp)
overdisp(COVID, dependent.position = 6,
          predictor.position = 1:5, sig = NULL)

# Function for determining outliers and extreme values
library(rstatix)
identify_outliers(COVID, counts)

# Histogram of observed and theoretical distributions
# and parametric coefficients
library(gamlss)
histDist(COVID$counts, family=ZANBI, na.rm=TRUE,
          ylim = 0.20) #or 'family=ZAPIG'

# GAMLSS parametric models
library(gamlss)
COVID_counts <- data.frame(Seq_No=COVID$Seq_No, counts=COVID$counts)
mCOVID<-gamlssML(counts,data=COVID_counts,family=ZANBI
) #similarly, with 'Other' data and with ZAPIG

# Best GAMLSS full models
library(gamlss)
Model15.6<-gamlss(counts~Age+Sex+Serious+Vaccine,data=na.omit(COVID),
sigma.formula=~X+Serious+X*Serious,family=ZANBI)
Model29.6<-gamlss(counts~Age+Serious,data=na.omit(Other),
sigma.formula=~X+Serious,family=ZANBI)

# Diagnostic plots
plot(mCOVID,ts=TRUE) #ACF, density, and Q-Q plots
rqres.plot(mCOVID, howmany=40, plot.type = "all"
) #worm plot with 40 bootstrap iterations

# ggplot2 graphics for covariates with
# linear regression and loess curves
mu_fv <- Model15.6$mu.fv
library(ggplot2)
ggplot(na.omit(COVID), aes(Age, mu_fv)) +
  geom_point(color="dimgray") +
  geom_smooth(method = "lm", color="red") +
  geom_smooth(method = "loess", color = "blue"
) #similar for other models, data, and covariates

# Composite term plots
op<-par(mfrow=c(1,3),mar=c(2,2,1,1)+0.1)

```

```
termplot(Model15.6, what="mu", terms=c(3,4,5), pages=1, se=T,xlabs=""  
) # makes a row with 3 plots for the factors Sex, Serious, Vaccine  
par(op)
```
