# Supplementary figures and images for: Modeling Adverse Events Counts in the Bulgarian Pharmacovigilance Database
Source: Preprints.org preprint supplement (doi:10.20944/preprints202309.0849.v1), 2023-09-13

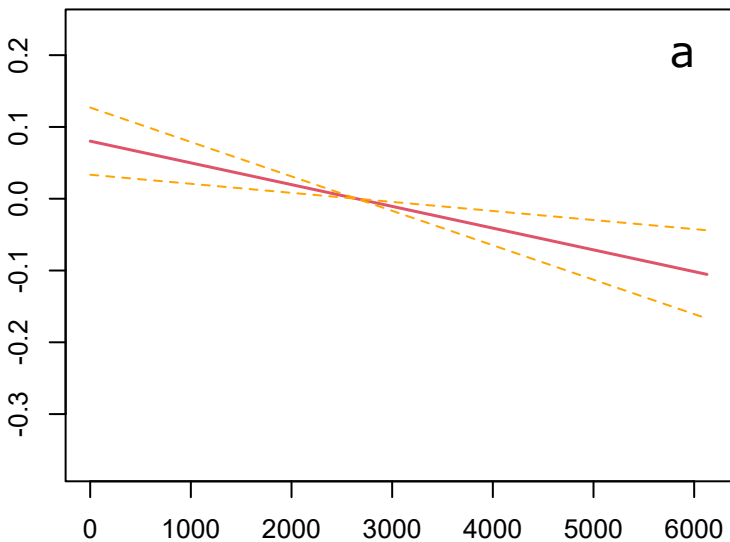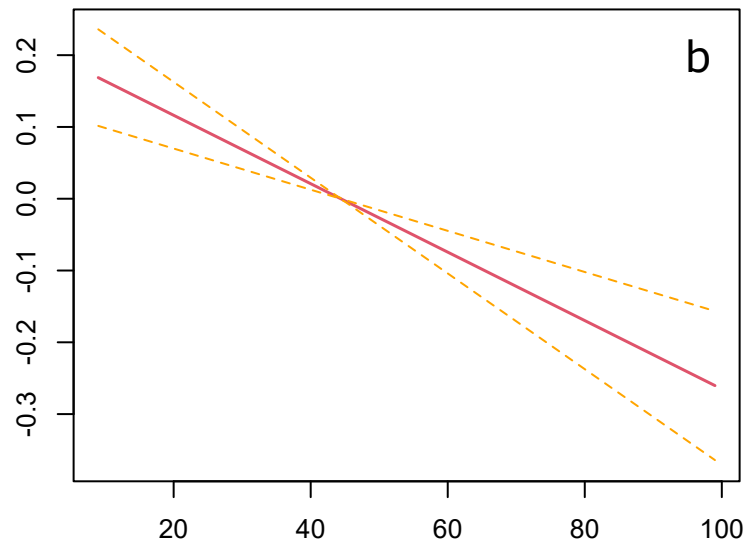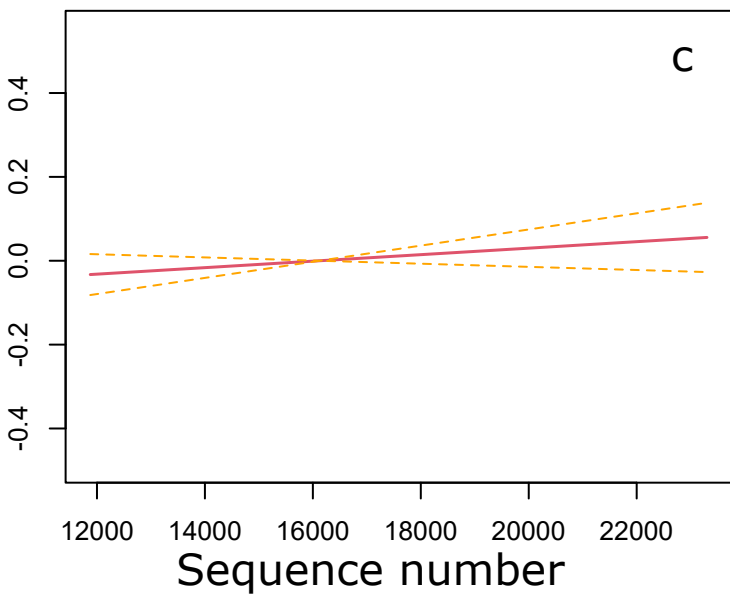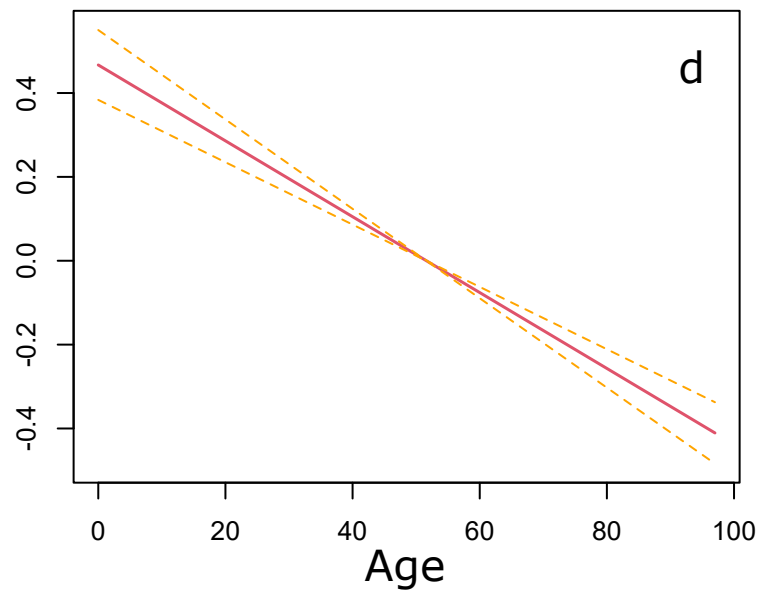

Supplement: Supplementary file 1 [file supplementary]

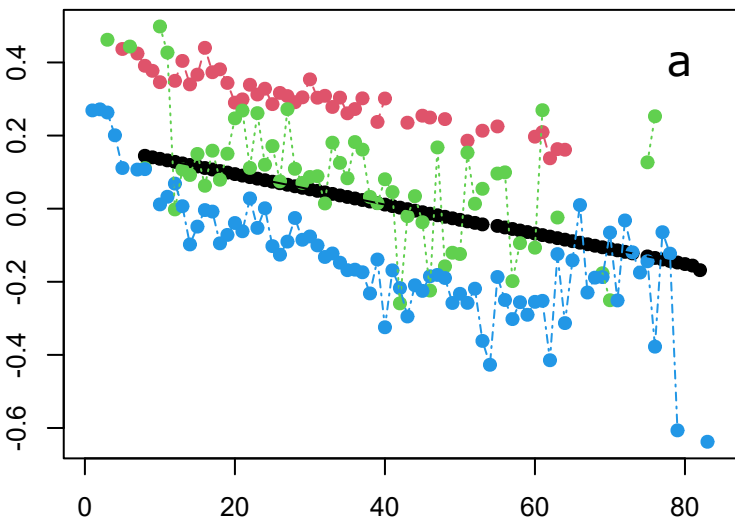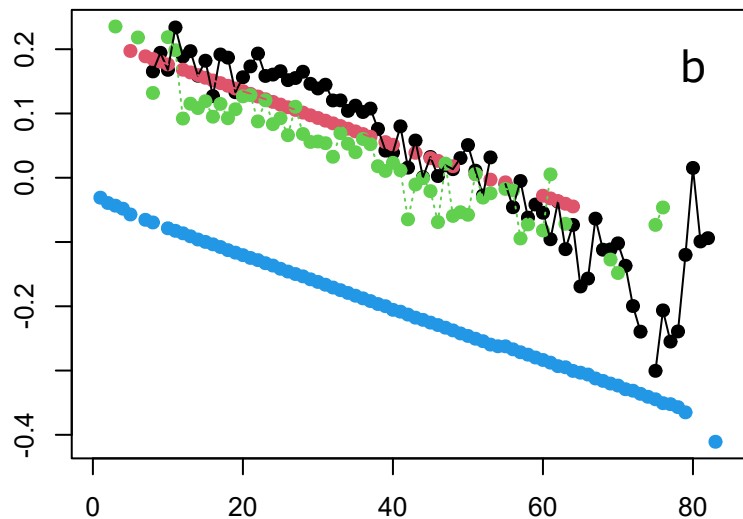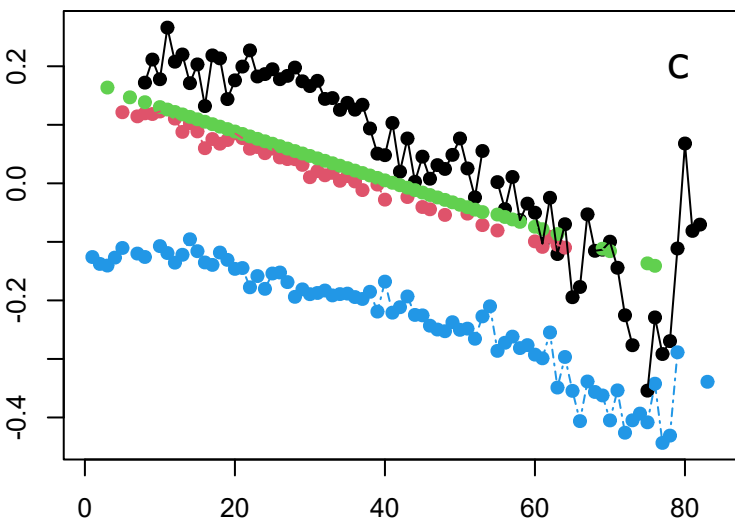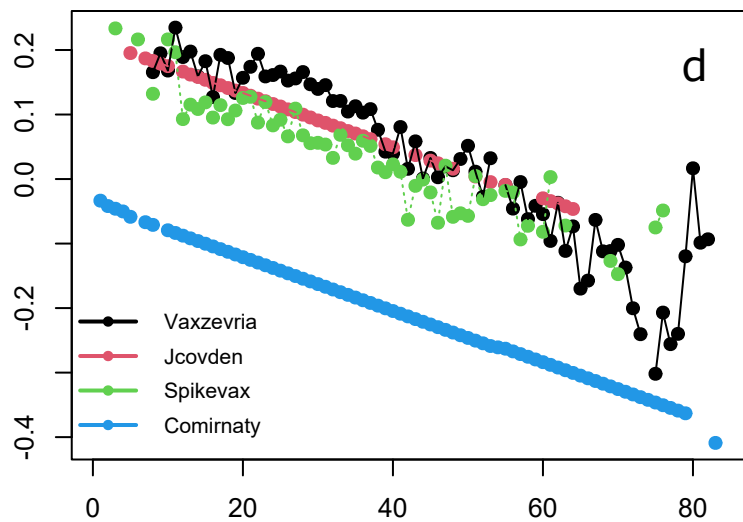

Age

Supplement: Supplementary file 2 [file supplementary]
